# Supplementary material for: The Role of Cytokinins and Abscisic Acid in the Growth, Development and Virulence of the Pathogenic Fungus Stagonospora nodorum (Berk.)
Source: MDPI journal article supplement (doi:10.3390/biom14050517), 2024-04-25
Supplement: s1 [file s1]

# The Role of Cytokinins and Abscissic Acid in the Growth, Development and Virulence of the Pathogenic Fungus *Stagonospora nodorum* (Berk.)

Tatyana V. Nuzhnaya <sup>1,2</sup>, Antonina V. Sorokan <sup>1</sup>, Guzel F. Burkhanova <sup>1</sup>, Igor V. Maksimov <sup>1</sup>  
and Svetlana V. Veselova <sup>1,\*</sup>

<sup>1</sup> Institute of Biochemistry and Genetics, Ufa Federal Research Centre, Russian Academy of Sciences, Prospekt Oktyabrya, 71, 450054 Ufa, Russia; tanyawww89@mail.ru (T.V.N.); fortyanns@googlemail.com (A.V.S.); guzel\_mur@mail.ru (G.F.B.); maksimov@ufaras.ru (I.V.M.)

<sup>2</sup> Ufa Institute of Biology, Ufa Federal Research Centre, Russian Academy of Sciences, Prospekt Oktyabrya, 69, 450054 Ufa, Russia

\* Correspondence: veselova75@rambler.ru; Tel.: +7-9173423941

**Supplementary Table S1.** Primers used for real-time PCR.

| <b>Genes</b>       | <b>Strand</b> | <b>5' to 3' Primer Sequences</b> | <b>GenBank accession number</b> |
|--------------------|---------------|----------------------------------|---------------------------------|
| <i>Sn_StuA</i>     | Forward       | ACCACCGTCTAGCAATCTTTAC           | SNOG_14941                      |
|                    | Reverse       | GGTATCCTTGGCTCGCATATT            |                                 |
| <i>Sn_Con7</i>     | Forward       | CTCACGAGCTTTGACGACTT             | SNOG_08362                      |
|                    | Reverse       | CATGACCCATCCGTAAAGAGAG           |                                 |
| <i>Sn_Pf2</i>      | Forward       | CATTCATCAGTCTCTGGAACCG           | SNOG_00649                      |
|                    | Reverse       | CGAATCTCGACGCCCTTGGG             |                                 |
| <i>SnToxA</i>      | Forward       | AACGCCAATACAGTGCGAGT             | JX997419                        |
|                    | Reverse       | GCTGCATTCTCCAATTTTCACG           |                                 |
| <i>SnTox1</i>      | Forward       | GTACTCCCGTACGTACTCTTCT           | JX997402                        |
|                    | Reverse       | CGCTTGTTTGCCGTTCTTAC             |                                 |
| <i>SnTox3</i>      | Forward       | CGAGCTGATATCCCGTTTGA             | FJ823644                        |
|                    | Reverse       | GGGACAGTGACAATAGGTAAGG           |                                 |
| <i>Snβ-tubulin</i> | Forward       | ACACCAGGAACAACCTGCTAACAGC        | S56922                          |
|                    | Reverse       | TATGCGCGCGTGCTGCAAATTCGA         |                                 |
| <i>SnMpd1</i>      | Forward       | CGATAGTTGGTGGTGGGAATCTC          | SNOG_15763                      |
|                    | Reverse       | TGTGGTGCTGCTTCGTATATC            |                                 |
| <i>SnMdh1</i>      | Forward       | ACGCAGACGAACGATACATTAC           | SNOG_15488                      |
|                    | Reverse       | ACGGTAATAGCTACAGGGAAGA           |                                 |
| <i>SnTps1</i>      | Forward       | AATATGAGGAGGGCCGTAAAC            | SNOG_03369                      |
|                    | Reverse       | GGTCGCTCACAACGTCTATAA            |                                 |
| <i>SnEF-1α</i>     | Forward       | CTCATCGTCGCCATCAAC               | GU456285.1                      |
|                    | Reverse       | TGTTGTCGCCGTTGAATC               |                                 |
